# Supplementary material for: Size matters: micro-evolution in Polynesian rats highlights body size changes as initial stage in evolution
Source: PeerJ. 2020 Apr 28;8:e9076. doi: 10.7717/peerj.9076 (PMC7194086; doi:10.7717/peerj.9076)
Supplement: Data S1 — This file contains specimen numbers of skulls of Rattus exulans examined at the American Museum of Natural History (New York; AMNH), the Smithsonian Institute, Natural History Museum (Washington; USNM) and Te Papa Tongarewa Museum of New Zealand (Wellington; NMNZ), as well as geographical and ecological data used as variables in the multivariate analyses. [file peerj-08-9076-s001.xlsx]

## Sheet: Data S1
Institute	specimen ID	Island	Region	Grouping	Archipelago	Gender	subspecies	haplotype	predators	competitors	latitude (absolute)	area (log km2)	elevation (m)
AMNH	60643	Moorea	Polynesia	Remote Oceania	Society Islands	m	exulans	3B	0	0	17.57	2.121	1207
AMNH	60645	Hiti	Polynesia	Remote Oceania	Tuamotu	m	exulans		0	0	16.75	0.477	1
AMNH	60785	Scilly Atoll	Polynesia	Remote Oceania	Society Islands	m	exulans	3B	0	0	16.52	0.544	5
AMNH	63774	Nuku Hiva	Polynesia	Remote Oceania	Marquesas		exulans	3B	0	0	8.95	2.538	1186
AMNH	63776		Polynesia	Remote Oceania	Marquesas		exulans	3B	0	0	9.45
AMNH	68740	Orona	Micronesia	Remote Oceania	Kiribati	f	exulans		0	0	4.58	0.591	9
AMNH	68742	Rose Atoll	Polynesia	Remote Oceania	Samoa	m	exulans	3	0	0	14.53	-1	3
AMNH	68748	Ofu	Polynesia	Remote Oceania	Samoa	f	exulans	3A 3B	0	0	14.19	0.875	494
AMNH	69264		Melanesia	Remote Oceania	Fiji	f	exulans	3B	0	0	17.8
AMNH	73623	Efaté	Polynesian Outlier	Inter Oceania	Vanuatu	m	vitiensis	3	0	0	17.69	2.954	647
AMNH	73624	Kelefasia	Polynesia	Remote Oceania	Tonga	m	exulans		0	0	20.5	-0.921	37.5
AMNH	77946	Telekitonga	Polynesia	Remote Oceania	Tonga	f	exulans		0	0	20.4	-0.348	16.2
AMNH	77947	Lalona	Polynesia	Remote Oceania	Tonga		exulans		0	0	20.35	-0.553	1
AMNH	79815	Bougainville	Melanesia	Island PNG	Solomons	m	vitiensis	2	0	1 to 4	6.2	3.969	2792
AMNH	79816	Bougainville	Melanesia	Island PNG	Solomons	m	vitiensis	2	0	1 to 4	6.2	3.969	2792
AMNH	79818	Bougainville	Melanesia	Island PNG	Solomons	m	vitiensis	2	0	1 to 4	6.2	3.969	2792
AMNH	79819	Bougainville	Melanesia	Island PNG	Solomons	f	vitiensis	2	0	1 to 4	6.2	3.969	2792
AMNH	79821	Bougainville	Melanesia	Island PNG	Solomons	m	vitiensis	2	0	1 to 4	6.2	3.969	2792
AMNH	88679	Uvea	Polynesian Outlier	Inter Oceania	New Caledonia	m	vitiensis	3B	0	0	20.6	2.125	39
AMNH	99703	Apataki	Polynesia	Remote Oceania	Tuamotu	m	exulans	3B	0	0	15.5	1.322	5
AMNH	99717	Hatutaa	Polynesia	Remote Oceania	Marquesas		exulans	3B	0	0	7.93	1.258	428
AMNH	99718	Aratika	Polynesia	Remote Oceania	Tuamotu	m	exulans		0	0	15.55	0.919	5
AMNH	99721	Uapu	Polynesia	Remote Oceania	Marquesas		exulans	3B	0	0	9.4	2.048	1231
AMNH	99725	Fakarava	Polynesia	Remote Oceania	Tuamotu	m	exulans		0	0	16.17	1.382	3
AMNH	99753	Bougainville	Melanesia	Island PNG	Solomons		vitiensis	2	0	1 to 4	6.2	3.969	2792
AMNH	99754	Malakula	Melanesia	Inter Oceania	Vanuatu		vitiensis	3A 3B	0	0	16.3	3.31	879
AMNH	99755	Malakula	Melanesia	Inter Oceania	Vanuatu		vitiensis	3A 3B	0	0	16.3	3.31	879
AMNH	99758	Malakula	Melanesia	Inter Oceania	Vanuatu		vitiensis	3A 3B	0	0	16.3	3.31	879
AMNH	99760	Malakula	Melanesia	Inter Oceania	Vanuatu		vitiensis	3A 3B	0	0	16.3	3.31	879
AMNH	99763	Raraka	Polynesia	Remote Oceania	Tuamotu	m	exulans		0	0	16.16	0.857	5
AMNH	99770	Ducie	Polynesia	Remote Oceania	Pitcairns	f	exulans		0	0	24.67	-0.155	4
AMNH	99772	Henderson	Polynesia	Remote Oceania	Pitcairns	m	exulans		0	0	24.42	1.572	33
AMNH	99773	Henderson	Polynesia	Remote Oceania	Pitcairns	f	exulans		0	0	24.42	1.572	33
AMNH	99781	Henderson	Polynesia	Remote Oceania	Pitcairns	m	exulans		0	0	24.42	1.572	33
AMNH	99782	Henderson	Polynesia	Remote Oceania	Pitcairns	m	exulans		0	0	24.42	1.572	33
AMNH	99784	Ducie	Polynesia	Remote Oceania	Pitcairns	m	exulans		0	0	24.67	-0.155	4
AMNH	99785	Ducie	Polynesia	Remote Oceania	Pitcairns		exulans		0	0	24.67	-0.155	4
AMNH	99788	Henderson	Polynesia	Remote Oceania	Pitcairns	m	exulans		0	0	24.42	1.572	33
AMNH	99789	Henderson	Polynesia	Remote Oceania	Pitcairns	m	exulans		0	0	24.42	1.572	33
AMNH	99790	Henderson	Polynesia	Remote Oceania	Pitcairns	m	exulans		0	0	24.42	1.572	33
AMNH	99791	Ducie	Polynesia	Remote Oceania	Pitcairns	m	exulans		0	0	24.67	-0.155	4
AMNH	99792	Tureia	Polynesia	Remote Oceania	Tuamotu	f	exulans		0	0	20.77	0.903	5
AMNH	99793	Ahunui	Polynesia	Remote Oceania	Tuamotu	m	exulans		0	0	19.58	0.756	5
AMNH	99795	Rapa Iti	Polynesia	Remote Oceania	Austral Islands	m	exulans	3	0	0	26.6	1.602	650
AMNH	99796	Rapa Iti	Polynesia	Remote Oceania	Austral Islands	f	exulans	3	0	0	26.6	1.602	650
AMNH	99797	Raraka	Polynesia	Remote Oceania	Tuamotu	m	exulans		0	0	16.16	0.857	5
AMNH	99799	Hatutaa	Polynesia	Remote Oceania	Marquesas		exulans	3B	0	0	7.93	1.258	428
AMNH	100986	Sulawesi	Wallacea	PhBS	Indonesia	f	raveni	1	1 or 2	5 or more	2	5.257	3455
AMNH	101297	Halmahera	Wallacea	Malukus	Malukus	f		2 3B	0	1 to 4	0.5	4.256	1635
AMNH	101300	Halmahera	Wallacea	Malukus	Malukus	m		2 3B	0	1 to 4	0.5	4.256	1635
AMNH	102004	Java	Sunda	Southern Malay Archipelago	Sunda	f	ephippium		3 or more	5 or more	7.5	5.142	3676
AMNH	102154	Bali	Sunda	Southern Malay Archipelago	Sunda	f	concolor		3 or more	1 to 4	8.4	3.734	2276
AMNH	102690	Sumatra	Sunda	Southern Malay Archipelago	Sunda	f	ephippium		3 or more	5 or more	0.5	5.646	3804
AMNH	102800	Sumatra	Sunda	Southern Malay Archipelago	Sunda	m	ephippium		3 or more	5 or more	0.5	5.646	3804
AMNH	103518	Borneo	Sunda	PhBS	Sunda	m	ephippium	1	3 or more	5 or more	1	5.874	4175
AMNH	103519	Borneo	Sunda	PhBS	Sunda	m	ephippium	1	3 or more	5 or more	1	5.874	4175
AMNH	103527	Borneo	Sunda	PhBS	Sunda	m	ephippium	1	3 or more	5 or more	1	5.874	4175
AMNH	103830	Borneo	Sunda	PhBS	Sunda	m	ephippium	1	3 or more	5 or more	1	5.874	4175
AMNH	103832	Borneo	Sunda	PhBS	Sunda	f	ephippium	1	3 or more	5 or more	1	5.874	4175
AMNH	103835	Borneo	Sunda	PhBS	Sunda	f	ephippium	1	3 or more	5 or more	1	5.874	4175
AMNH	104220	New Guinea	Melanesia	New Guinea	New Guinea	m	browni	2	3 or more	5 or more	6	5.895	5030
AMNH	104247	New Guinea	Melanesia	New Guinea	New Guinea	f	browni	2	3 or more	5 or more	6	5.895	5030
AMNH	106127	Borneo	Sunda	PhBS	Sunda	m	ephippium	1	3 or more	5 or more	1	5.874	4175
AMNH	106193	Borneo	Sunda	PhBS	Sunda	f	ephippium	1	3 or more	5 or more	1	5.874	4175
AMNH	106198	Borneo	Sunda	PhBS	Sunda	m	ephippium	1	3 or more	5 or more	1	5.874	4175
AMNH	106360	Sumatra	Sunda	Southern Malay Archipelago	Sunda	f	ephippium		3 or more	5 or more	0.5	5.646	3804
AMNH	106362	Sumatra	Sunda	Southern Malay Archipelago	Sunda	f	ephippium		3 or more	5 or more	0.5	5.646	3804
AMNH	106868	Java	Sunda	Southern Malay Archipelago	Sunda	m	ephippium		3 or more	5 or more	7.5	5.142	3676
AMNH	107976	Bali	Sunda	Southern Malay Archipelago	Sunda	f	concolor		3 or more	1 to 4	8.4	3.734	2276
AMNH	108222	New Guinea	Melanesia	New Guinea	New Guinea	f	browni	2	3 or more	5 or more	6	5.895	5030
AMNH	108225	New Guinea	Melanesia	New Guinea	New Guinea	f	browni	2	3 or more	5 or more	6	5.895	5030
AMNH	109183	Peleng	Wallacea	PhBS	Sulawesi	f	raveni		0	1 to 4	1.38	3.37	1052
AMNH	109184	Peleng	Wallacea	PhBS	Sulawesi	f	raveni		0	1 to 4	1.38	3.37	1052
AMNH	109302	Taliabu	Wallacea	Malukus	Malukus	f			0	1 to 4	1.83	3.464	1638
AMNH	109304	Taliabu	Wallacea	Malukus	Malukus	m			0	1 to 4	1.83	3.464	1638
AMNH	109305	Taliabu	Wallacea	Malukus	Malukus	m			0	1 to 4	1.83	3.464	1638
AMNH	109309	Taliabu	Wallacea	Malukus	Malukus	m			0	1 to 4	1.83	3.464	1638
AMNH	109312	Taliabu	Wallacea	Malukus	Malukus	f			0	1 to 4	1.83	3.464	1638
AMNH	109313	Taliabu	Wallacea	Malukus	Malukus	f			0	1 to 4	1.83	3.464	1638
AMNH	110088	New Guinea	Melanesia	New Guinea	New Guinea	m	browni	2	3 or more	5 or more	6	5.895	5030
AMNH	130385	Lifou	Melanesia	Inter Oceania	New Caledonia	m	vitiensis	3B	0	0	20.95	3.059	85
AMNH	144152	Oahu	Polynesia	Remote Oceania	Hawaii	m	exulans	3B	0	0	21.5	3.2	1227
AMNH	150919	New Guinea	Melanesia	New Guinea	New Guinea	m	browni	2	3 or more	5 or more	6	5.895	5030
AMNH	153293	Malenge	Wallacea	PhBS	Togian	f	raveni		0	1 to 4	0.25	1.126	178
AMNH	153294	Malenge	Wallacea	PhBS	Togian	f	raveni		0	1 to 4	0.25	1.126	178
AMNH	153296	Malenge	Wallacea	PhBS	Togian	m	raveni		0	1 to 4	0.25	1.126	178
AMNH	153297	Malenge	Wallacea	PhBS	Togian	m	raveni		0	1 to 4	0.25	1.126	178
AMNH	153299	Malenge	Wallacea	PhBS	Togian	m	raveni		0	1 to 4	0.25	1.126	178
AMNH	153306	Malenge	Wallacea	PhBS	Togian	f	raveni		0	1 to 4	0.25	1.126	178
AMNH	157909	New Guinea	Melanesia	New Guinea	New Guinea	m	browni	2	3 or more	5 or more	6	5.895	5030
AMNH	157910	New Guinea	Melanesia	New Guinea	New Guinea	m	browni	2	3 or more	5 or more	6	5.895	5030
AMNH	157913	New Guinea	Melanesia	New Guinea	New Guinea	m	browni	2	3 or more	5 or more	6	5.895	5030
AMNH	157924	New Guinea	Melanesia	New Guinea	New Guinea	f	browni	2	3 or more	5 or more	6	5.895	5030
AMNH	157926	Goodenough	Melanesia	Island PNG	New Guinea	m	vitiensis	2	0	1 to 4	9.5	2.837	2566
AMNH	157930	Goodenough	Melanesia	Island PNG	New Guinea	m	vitiensis	2	0	1 to 4	9.5	2.837	2566
AMNH	157936	Goodenough	Melanesia	Island PNG	New Guinea	f	vitiensis	2	0	1 to 4	9.5	2.837	2566
AMNH	157940	Goodenough	Melanesia	Island PNG	New Guinea	f	vitiensis	2	0	1 to 4	9.5	2.837	2566
AMNH	157942	Goodenough	Melanesia	Island PNG	New Guinea	m	vitiensis	2	0	1 to 4	9.5	2.837	2566
AMNH	157943	Goodenough	Melanesia	Island PNG	New Guinea	m	vitiensis	2	0	1 to 4	9.5	2.837	2566
AMNH	157947	Goodenough	Melanesia	Island PNG	New Guinea	f	vitiensis	2	0	1 to 4	9.5	2.837	2566
AMNH	159684	Woodlark	Melanesia	Island PNG	Woodlark Islands	m	vitiensis	2	0	1 to 4	9.1	2.941	225
AMNH	159685	Woodlark	Melanesia	Island PNG	Woodlark Islands	m	vitiensis	2	0	1 to 4	9.1	2.941	225
AMNH	159690	Woodlark	Melanesia	Island PNG	Woodlark Islands	f	vitiensis	2	0	1 to 4	9.1	2.941	225
AMNH	159692	Rossel	Melanesia	Island PNG	Louisiade	m	vitiensis	2	0	0	11.4	2.42	838
AMNH	159695	Rossel	Melanesia	Island PNG	Louisiade	m	vitiensis	2	0	0	11.4	2.42	838
AMNH	159700	Rossel	Melanesia	Island PNG	Louisiade	f	vitiensis	2	0	0	11.4	2.42	838
AMNH	159702	Rossel	Melanesia	Island PNG	Louisiade	f	vitiensis	2	0	0	11.4	2.42	838
AMNH	159717	Vanatinai	Melanesia	Island PNG	Louisiade	m	vitiensis	2	0	1 to 4	11.5	2.92	815
AMNH	159718	Vanatinai	Melanesia	Island PNG	Louisiade	m	vitiensis	2	0	1 to 4	11.5	2.92	815
AMNH	159723	Vanatinai	Melanesia	Island PNG	Louisiade	m	vitiensis	2	0	1 to 4	11.5	2.92	815
AMNH	159724	Vanatinai	Melanesia	Island PNG	Louisiade	m	vitiensis	2	0	1 to 4	11.5	2.92	815
AMNH	159725	Vanatinai	Melanesia	Island PNG	Louisiade	f	vitiensis	2	0	1 to 4	11.5	2.92	815
AMNH	159738	Fergusson	Melanesia	Island PNG	New Guinea	m	vitiensis	2	0	5 or more	9.6	3.157	2072
AMNH	159741	Fergusson	Melanesia	Island PNG	New Guinea	f	vitiensis	2	0	5 or more	9.6	3.157	2072
AMNH	159742	Fergusson	Melanesia	Island PNG	New Guinea	f	vitiensis	2	0	5 or more	9.6	3.157	2072
AMNH	159745	Normanby	Melanesia	Island PNG	New Guinea	m	vitiensis	2	0	5 or more	10	3.017	1100
AMNH	159746	Normanby	Melanesia	Island PNG	New Guinea	m	vitiensis	2	0	5 or more	10	3.017	1100
AMNH	159747	Normanby	Melanesia	Island PNG	New Guinea	m	vitiensis	2	0	5 or more	10	3.017	1100
AMNH	159749	Normanby	Melanesia	Island PNG	New Guinea	m	vitiensis	2	0	5 or more	10	3.017	1100
AMNH	159761	Normanby	Melanesia	Island PNG	New Guinea	f	vitiensis	2	0	5 or more	10	3.017	1100
AMNH	163813	Myanmar	Mainland	Mainland	Mainland	m	concolor		3 or more	5 or more	22	5.83	5881
AMNH	187195	Luzon	Wallacea	PhBS	Philippines	f	negrinus		0	5 or more	16	5.041	2934
AMNH	191568	New Guinea	Melanesia	New Guinea	New Guinea	f	browni	2	3 or more	5 or more	6	5.895	5030
AMNH	191569	New Guinea	Melanesia	New Guinea	New Guinea	m	browni	2	3 or more	5 or more	6	5.895	5030
AMNH	191570	New Guinea	Melanesia	New Guinea	New Guinea	m	browni	2	3 or more	5 or more	6	5.895	5030
AMNH	191571	New Guinea	Melanesia	New Guinea	New Guinea	m	browni	2	3 or more	5 or more	6	5.895	5030
AMNH	191574	New Guinea	Melanesia	New Guinea	New Guinea	f	browni	2	3 or more	5 or more	6	5.895	5030
AMNH	191576	New Guinea	Melanesia	New Guinea	New Guinea	f	browni	2	3 or more	5 or more	6	5.895	5030
AMNH	193656	Bougainville	Melanesia	Island PNG	Solomons	f	vitiensis	2	0	1 to 4	6.2	3.969	2792
AMNH	193754	Manus	Melanesia	Island PNG	Bismarck	m	vitiensis	2	0	1 to 4	2.05	3.287	718
AMNH	193756	Manus	Melanesia	Island PNG	Bismarck	m	vitiensis	2	0	1 to 4	2.05	3.287	718
AMNH	193758	Manus	Melanesia	Island PNG	Bismarck	f	vitiensis	2	0	1 to 4	2.05	3.287	718
AMNH	193759	Manus	Melanesia	Island PNG	Bismarck	f	vitiensis	2	0	1 to 4	2.05	3.287	718
AMNH	194386	New Britain	Melanesia	Island PNG	Bismarck	m	vitiensis	2	1 or 2	5 or more	5.7	4.546	2500
AMNH	194389	New Britain	Melanesia	Island PNG	Bismarck	m	vitiensis	2	1 or 2	5 or more	5.7	4.546	2500
AMNH	194391	New Britain	Melanesia	Island PNG	Bismarck	m	vitiensis	2	1 or 2	5 or more	5.7	4.546	2500
AMNH	195063	New Guinea	Melanesia	New Guinea	New Guinea	m	browni	2	3 or more	5 or more	6	5.895	5030
AMNH	195064	New Guinea	Melanesia	New Guinea	New Guinea	f	browni	2	3 or more	5 or more	6	5.895	5030
AMNH	195068	New Guinea	Melanesia	New Guinea	New Guinea	f	browni	2	3 or more	5 or more	6	5.895	5030
AMNH	195071	New Guinea	Melanesia	New Guinea	New Guinea	m	browni	2	3 or more	5 or more	6	5.895	5030
AMNH	195075	New Guinea	Melanesia	New Guinea	New Guinea	f	browni	2	3 or more	5 or more	6	5.895	5030
AMNH	207544	Negros	Wallacea	PhBS	Philippines	f	negrinus	1 2	0	1 to 4	10	4.116	2464
AMNH	207545	Negros	Wallacea	PhBS	Philippines	m	negrinus	1 2	0	1 to 4	10	4.116	2464
AMNH	207546	Negros	Wallacea	PhBS	Philippines	m	negrinus	1 2	0	1 to 4	10	4.116	2464
AMNH	207548	Negros	Wallacea	PhBS	Philippines	m	negrinus	1 2	0	1 to 4	10	4.116	2464
AMNH	207550	Negros	Wallacea	PhBS	Philippines	m	negrinus	1 2	0	1 to 4	10	4.116	2464
AMNH	214985	Thailand	Mainland	Mainland	Mainland	m	concolor		3 or more	5 or more	15	5.71	2565
AMNH	214987	Thailand	Mainland	Mainland	Mainland	m	concolor		3 or more	5 or more	15	5.71	2565
AMNH	222324	New Britain	Melanesia	Island PNG	Bismarck	m	vitiensis	2	1 or 2	5 or more	5.7	4.546	2500
AMNH	222332	New Britain	Melanesia	Island PNG	Bismarck	f	vitiensis	2	1 or 2	5 or more	5.7	4.546	2500
AMNH	222333	New Britain	Melanesia	Island PNG	Bismarck	f	vitiensis	2	1 or 2	5 or more	5.7	4.546	2500
AMNH	222357	New Guinea	Melanesia	New Guinea	New Guinea	f	browni	2	3 or more	5 or more	6	5.895	5030
AMNH	222358	New Guinea	Melanesia	New Guinea	New Guinea	f	browni	2	3 or more	5 or more	6	5.895	5030
AMNH	222360	New Guinea	Melanesia	New Guinea	New Guinea	f	browni	2	3 or more	5 or more	6	5.895	5030
AMNH	222364	New Guinea	Melanesia	New Guinea	New Guinea	m	browni	2	3 or more	5 or more	6	5.895	5030
AMNH	223102	Sulawesi	Wallacea	PhBS	Indonesia	f	raveni	1	1 or 2	5 or more	2	5.257	3455
AMNH	223107	Sulawesi	Wallacea	PhBS	Indonesia	m	raveni	1	1 or 2	5 or more	2	5.257	3455
AMNH	223109	Sulawesi	Wallacea	PhBS	Indonesia	m	raveni	1	1 or 2	5 or more	2	5.257	3455
AMNH	223114	Sulawesi	Wallacea	PhBS	Indonesia	m	raveni	1	1 or 2	5 or more	2	5.257	3455
AMNH	223116	Sulawesi	Wallacea	PhBS	Indonesia	f	raveni	1	1 or 2	5 or more	2	5.257	3455
AMNH	240056	Laos	Mainland	Mainland	Mainland	f	concolor		3 or more	5 or more	18	5.376	2818
AMNH	242151	Luzon	Wallacea	PhBS	Philippines		negrinus		0	5 or more	16	5.041	2934
AMNH	242168	Luzon	Wallacea	PhBS	Philippines		negrinus		0	5 or more	16	5.041	2934
AMNH	242178	Mindanao	Wallacea	PhBS	Philippines		todayensis		0	5 or more	7.5	4.989	2954
AMNH	251867	Java	Sunda	Southern Malay Archipelago	Sunda	m	ephippium		3 or more	5 or more	7.5	5.142	3676
AMNH	251869	Java	Sunda	Southern Malay Archipelago	Sunda	m	ephippium		3 or more	5 or more	7.5	5.142	3676
AMNH	251895	Java	Sunda	Southern Malay Archipelago	Sunda	m	ephippium		3 or more	5 or more	7.5	5.142	3676
AMNH	267666	Halmahera	Wallacea	Malukus	Malukus	m		2 3B	0	1 to 4	0.5	4.256	1635
AMNH	267669	Halmahera	Wallacea	Malukus	Malukus	m		2 3B	0	1 to 4	0.5	4.256	1635
AMNH	267687	Halmahera	Wallacea	Malukus	Malukus	m		2 3B	0	1 to 4	0.5	4.256	1635
AMNH	267688	Halmahera	Wallacea	Malukus	Malukus	m		2 3B	0	1 to 4	0.5	4.256	1635
AMNH	267689	Halmahera	Wallacea	Malukus	Malukus	m		2 3B	0	1 to 4	0.5	4.256	1635
AMNH	267696	Halmahera	Wallacea	Malukus	Malukus	f		2 3B	0	1 to 4	0.5	4.256	1635
AMNH	267704	Ambon	Wallacea	Malukus	Malukus	m			0	0	3.64	2.906	1031
AMNH	267705	Ambon	Wallacea	Malukus	Malukus	f			0	0	3.64	2.906	1031
NMNZ	117	Whakaari	Polynesia	New Zealand	New Zealand	m	exulans		0	0	37.52	0.512	321
NMNZ	122	Tiritiri	Polynesia	New Zealand	New Zealand		exulans	3	0	0	36.6	0.294	90
NMNZ	135	North Island	Polynesia	New Zealand	New Zealand		exulans	3A 3B	0	0	38	5.048	2796
NMNZ	215	Rurima	Polynesia	New Zealand	New Zealand	f	exulans		0	0	15.17	2.09	474
NMNZ	227	Whakaari	Polynesia	New Zealand	New Zealand	m	exulans		0	0	37.52	0.512	321
NMNZ	255	Little Barrier	Polynesia	New Zealand	New Zealand		exulans	3	0	0	35.31	1.462	722
NMNZ	359	Tiritiri	Polynesia	New Zealand	New Zealand		exulans	3	0	0	36.6	0.294	90
NMNZ	360	Tiritiri	Polynesia	New Zealand	New Zealand		exulans	3	0	0	36.6	0.294	90
NMNZ	362	Tiritiri	Polynesia	New Zealand	New Zealand		exulans	3	0	0	36.6	0.294	90
NMNZ	363	Tiritiri	Polynesia	New Zealand	New Zealand		exulans	3	0	0	36.6	0.294	90
NMNZ	378	Tiritiri	Polynesia	New Zealand	New Zealand		exulans	3	0	0	36.6	0.294	90
NMNZ	470	Tiritiri	Polynesia	New Zealand	New Zealand		exulans	3	0	0	36.6	0.294	90
NMNZ	576	Tiritiri	Polynesia	New Zealand	New Zealand		exulans	3	0	0	36.6	0.294	90
NMNZ	4046	Repanga	Polynesia	New Zealand	New Zealand	f	exulans	3	0	0	36.43	0.23	214
NMNZ	4047	Repanga	Polynesia	New Zealand	New Zealand	f	exulans	3	0	0	36.43	0.23	214
NMNZ	4048	Repanga	Polynesia	New Zealand	New Zealand	f	exulans	3	0	0	36.43	0.23	214
NMNZ	4051	Repanga	Polynesia	New Zealand	New Zealand	m	exulans	3	0	0	36.43	0.23	214
NMNZ	4053	Repanga	Polynesia	New Zealand	New Zealand	m	exulans	3	0	0	36.43	0.23	214
NMNZ	4055	Repanga	Polynesia	New Zealand	New Zealand	m	exulans	3	0	0	36.43	0.23	214
NMNZ	4057	Repanga	Polynesia	New Zealand	New Zealand	m	exulans	3	0	0	36.43	0.23	214
NMNZ	4069	Motukawanui	Polynesia	New Zealand	New Zealand	m	exulans	3	0	0	35.02	0.531	177
NMNZ	4072	Motukawanui	Polynesia	New Zealand	New Zealand	m	exulans	3	0	0	35.02	0.531	177
NMNZ	4074	Motukawanui	Polynesia	New Zealand	New Zealand	f	exulans	3	0	0	35.02	0.531	177
NMNZ	4075	Motukawanui	Polynesia	New Zealand	New Zealand	m	exulans	3	0	0	35.02	0.531	177
NMNZ	4077	Motukawanui	Polynesia	New Zealand	New Zealand	f	exulans	3	0	0	35.02	0.531	177
NMNZ	4078	Motukawanui	Polynesia	New Zealand	New Zealand	f	exulans	3	0	0	35.02	0.531	177
NMNZ	4089	Macauley	Polynesia	Remote Oceania	Kermadecs	f	exulans	3	0	0	30.23	0.568	238
NMNZ	4095	Macauley	Polynesia	Remote Oceania	Kermadecs	m	exulans	3	0	0	30.23	0.568	238
NMNZ	4097	Macauley	Polynesia	Remote Oceania	Kermadecs	f	exulans	3	0	0	30.23	0.568	238
NMNZ	4098	Macauley	Polynesia	Remote Oceania	Kermadecs	f	exulans	3	0	0	30.23	0.568	238
NMNZ	4106	Macauley	Polynesia	Remote Oceania	Kermadecs	m	exulans	3	0	0	30.23	0.568	238
NMNZ	4113	Macauley	Polynesia	Remote Oceania	Kermadecs	m	exulans	3	0	0	30.23	0.568	238
NMNZ	4121	Long Island	Polynesia	New Zealand	New Zealand	f	exulans	3	0	0	41.11	0.149	152
NMNZ	4124	Motuara	Polynesia	New Zealand	New Zealand	f	exulans		0	0	36.51	-0.097	67
NMNZ	4126	Motuara	Polynesia	New Zealand	New Zealand	m	exulans		0	0	36.51	-0.097	67
NMNZ	7107	Tiritiri	Polynesia	New Zealand	New Zealand		exulans	3	0	0	36.6	0.294	90
NMNZ	7117	Tiritiri	Polynesia	New Zealand	New Zealand		exulans	3	0	0	36.6	0.294	90
NMNZ	7415	Tiritiri	Polynesia	New Zealand	New Zealand		exulans	3	0	0	36.6	0.294	90
NMNZ	7420	Tiritiri	Polynesia	New Zealand	New Zealand		exulans	3	0	0	36.6	0.294	90
NMNZ	7437	Tiritiri	Polynesia	New Zealand	New Zealand		exulans	3	0	0	36.6	0.294	90
NMNZ	7439	Tiritiri	Polynesia	New Zealand	New Zealand		exulans	3	0	0	36.6	0.294	90
NMNZ	7440	Tiritiri	Polynesia	New Zealand	New Zealand		exulans	3	0	0	36.6	0.294	90
NMNZ	7447	Tiritiri	Polynesia	New Zealand	New Zealand		exulans	3	0	0	36.6	0.294	90
NMNZ	7453	Tiritiri	Polynesia	New Zealand	New Zealand		exulans	3	0	0	36.6	0.294	90
NMNZ	7509	Tiritiri	Polynesia	New Zealand	New Zealand		exulans	3	0	0	36.6	0.294	90
NMNZ	c122	Tiritiri Matangi	Polynesia	New Zealand	New Zealand		exulans	3	0	0	36.6	0.294	90
NMNZ	c359	Tiritiri Matangi	Polynesia	New Zealand	New Zealand		exulans	3	0	0	36.6	0.294	90
NMNZ	c360	Tiritiri Matangi	Polynesia	New Zealand	New Zealand		exulans	3	0	0	36.6	0.294	90
NMNZ	c362	Tiritiri Matangi	Polynesia	New Zealand	New Zealand		exulans	3	0	0	36.6	0.294	90
NMNZ	c363	Tiritiri Matangi	Polynesia	New Zealand	New Zealand		exulans	3	0	0	36.6	0.294	90
NMNZ	c378	Tiritiri Matangi	Polynesia	New Zealand	New Zealand		exulans	3	0	0	36.6	0.294	90
NMNZ	c470	Tiritiri Matangi	Polynesia	New Zealand	New Zealand		exulans	3	0	0	36.6	0.294	90
NMNZ	c576	Tiritiri Matangi	Polynesia	New Zealand	New Zealand		exulans	3	0	0	36.6	0.294	90
NMNZ	ed117	Whakaari	Polynesia	New Zealand	New Zealand	m	exulans		0	0	37.52	0.512	321
NMNZ	ed4046	Repanga	Polynesia	New Zealand	New Zealand	f	exulans	3	0	0	36.43	0.23	214
NMNZ	ed4047	Repanga	Polynesia	New Zealand	New Zealand	f	exulans	3	0	0	36.43	0.23	214
NMNZ	ed4048	Repanga	Polynesia	New Zealand	New Zealand	f	exulans	3	0	0	36.43	0.23	214
NMNZ	ed4051	Repanga	Polynesia	New Zealand	New Zealand	m	exulans	3	0	0	36.43	0.23	214
NMNZ	ed4053	Repanga	Polynesia	New Zealand	New Zealand	m	exulans	3	0	0	36.43	0.23	214
NMNZ	ed4055	Repanga	Polynesia	New Zealand	New Zealand	m	exulans	3	0	0	36.43	0.23	214
NMNZ	ed4057	Repanga	Polynesia	New Zealand	New Zealand	m	exulans	3	0	0	36.43	0.23	214
NMNZ	ed4069	Motukawanui	Polynesia	New Zealand	New Zealand	m	exulans	3	0	0	35.02	0.531	177
NMNZ	ed4072	Motukawanui	Polynesia	New Zealand	New Zealand	m	exulans	3	0	0	35.02	0.531	177
NMNZ	ed4074	Motukawanui	Polynesia	New Zealand	New Zealand	f	exulans	3	0	0	35.02	0.531	177
NMNZ	ed4075	Motukawanui	Polynesia	New Zealand	New Zealand	m	exulans	3	0	0	35.02	0.531	177
NMNZ	ed4077	Motukawanui	Polynesia	New Zealand	New Zealand	f	exulans	3	0	0	35.02	0.531	177
NMNZ	ed4078	Motukawanui	Polynesia	New Zealand	New Zealand	f	exulans	3	0	0	35.02	0.531	177
NMNZ	ed4089	Macauley	Polynesia	Remote Oceania	Kermadecs	f	exulans	3	0	0	30.23	0.568	238
NMNZ	ed4095	Macauley	Polynesia	Remote Oceania	Kermadecs	m	exulans	3	0	0	30.23	0.568	238
NMNZ	ed4097	Macauley	Polynesia	Remote Oceania	Kermadecs	f	exulans	3	0	0	30.23	0.568	238
NMNZ	ed4098	Macauley	Polynesia	Remote Oceania	Kermadecs	f	exulans	3	0	0	30.23	0.568	238
NMNZ	ed4106	Macauley	Polynesia	Remote Oceania	Kermadecs	m	exulans	3	0	0	30.23	0.568	238
NMNZ	ed4113	Macauley	Polynesia	Remote Oceania	Kermadecs	m	exulans	3	0	0	30.23	0.568	238
NMNZ	ed4121	Long Island	Polynesia	New Zealand	New Zealand	f	exulans	3	0	0	41.11	0.149	152
NMNZ	ed4124	Motuara	Polynesia	New Zealand	New Zealand	f	exulans		0	0	36.51	-0.097	67
NMNZ	ed4126	Motuara	Polynesia	New Zealand	New Zealand	m	exulans		0	0	36.51	-0.097	67
NMNZ	lb255	Little Barrier	Polynesia	New Zealand	New Zealand		exulans	3	0	0	35.31	1.462	722
NMNZ	n135	North Island	Polynesia	New Zealand	New Zealand		exulans	3A 3B	0	0	38	5.048	2796
NMNZ	r5	North Island	Polynesia	New Zealand	New Zealand		exulans	3A 3B	0	0	38	5.048	2796
NMNZ	z4046	Repanga	Polynesia	New Zealand	New Zealand	f	exulans	3	0	0	36.43	0.23	214
USNM	114185	Simeulue	Sunda	Southern Malay Archipelago	Sunda	m	ephippium		0	1 to 4	2.65	3.244	480
USNM	114187	Simeulue	Sunda	Southern Malay Archipelago	Sunda	m	ephippium		0	1 to 4	2.65	3.244	480
USNM	114189	Simeulue	Sunda	Southern Malay Archipelago	Sunda	f	ephippium		0	1 to 4	2.65	3.244	480
USNM	114190	Simeulue	Sunda	Southern Malay Archipelago	Sunda	m	ephippium		0	1 to 4	2.65	3.244	480
USNM	114192	Simeulue	Sunda	Southern Malay Archipelago	Sunda	m	ephippium		0	1 to 4	2.65	3.244	480
USNM	114195	Simeulue	Sunda	Southern Malay Archipelago	Sunda	f	ephippium		0	1 to 4	2.65	3.244	480
USNM	114197	Simeulue	Sunda	Southern Malay Archipelago	Sunda	f	ephippium		0	1 to 4	2.65	3.244	480
USNM	114199	Simeulue	Sunda	Southern Malay Archipelago	Sunda	f	ephippium		0	1 to 4	2.65	3.244	480
USNM	125223	Mindanao	Wallacea	PhBS	Philippines	f	todayensis		0	5 or more	7.5	4.989	2954
USNM	125225	Mindanao	Wallacea	PhBS	Philippines	m	todayensis		0	5 or more	7.5	4.989	2954
USNM	125227	Mindanao	Wallacea	PhBS	Philippines	m	todayensis		0	5 or more	7.5	4.989	2954
USNM	142126	Batam	Sunda	Southern Malay Archipelago	Sunda	f	concolor		0	1 to 4	1.05	2.601	189
USNM	143064	Luzon	Wallacea	PhBS	Philippines	m	negrinus		0	5 or more	16	5.041	2934
USNM	143249	Batam	Sunda	Southern Malay Archipelago	Sunda	f	concolor		0	1 to 4	1.05	2.601	189
USNM	143251	Batam	Sunda	Southern Malay Archipelago	Sunda	f	concolor		0	1 to 4	1.05	2.601	189
USNM	144233	Sumatra	Sunda	Southern Malay Archipelago	Sunda	m	ephippium		3 or more	5 or more	0.5	5.646	3804
USNM	144614	Mindanao	Wallacea	PhBS	Philippines	m	todayensis		0	5 or more	7.5	4.989	2954
USNM	145780	Luzon	Wallacea	PhBS	Philippines	f	negrinus		0	5 or more	16	5.041	2934
USNM	145781	Luzon	Wallacea	PhBS	Philippines	f	negrinus		0	5 or more	16	5.041	2934
USNM	145782	Luzon	Wallacea	PhBS	Philippines	f	negrinus		0	5 or more	16	5.041	2934
USNM	145804	Luzon	Wallacea	PhBS	Philippines	m	negrinus		0	5 or more	16	5.041	2934
USNM	145807	Luzon	Wallacea	PhBS	Philippines	m	negrinus		0	5 or more	16	5.041	2934
USNM	145812	Luzon	Wallacea	PhBS	Philippines	m	negrinus		0	5 or more	16	5.041	2934
USNM	145813	Luzon	Wallacea	PhBS	Philippines	m	negrinus		0	5 or more	16	5.041	2934
USNM	197328	Bali Kukup	Sunda	PhBS	Sunda	f	ephippium		0	0	2.15	-0.74	20
USNM	197329	Bali Kukup	Sunda	PhBS	Sunda	m	ephippium		0	0	2.15	-0.74	20
USNM	197331	Bali Kukup	Sunda	PhBS	Sunda	m	ephippium		0	0	2.15	-0.74	20
USNM	197333	Bali Kukup	Sunda	PhBS	Sunda	f	ephippium		0	0	2.15	-0.74	20
USNM	197336	Bali Kukup	Sunda	PhBS	Sunda	f	ephippium		0	0	2.15	-0.74	20
USNM	197342	Bali Kukup	Sunda	PhBS	Sunda	m	ephippium		0	0	2.15	-0.74	20
USNM	199917	Sulawesi	Wallacea	PhBS	Indonesia	m	raveni	1	1 or 2	5 or more	2	5.257	3455
USNM	199919	Sulawesi	Wallacea	PhBS	Indonesia	f	raveni	1	1 or 2	5 or more	2	5.257	3455
USNM	199920	Sulawesi	Wallacea	PhBS	Indonesia	f	raveni	1	1 or 2	5 or more	2	5.257	3455
USNM	199921	Sulawesi	Wallacea	PhBS	Indonesia	f	raveni	1	1 or 2	5 or more	2	5.257	3455
USNM	199923	Sulawesi	Wallacea	PhBS	Indonesia	m	raveni	1	1 or 2	5 or more	2	5.257	3455
USNM	199928	Sulawesi	Wallacea	PhBS	Indonesia	m	raveni	1	1 or 2	5 or more	2	5.257	3455
USNM	236898	Oahu	Polynesia	Remote Oceania	Hawaii	f	hawaiiensis	3B	0	0	21.5	3.2	1227
USNM	237604	Oahu	Polynesia	Remote Oceania	Hawaii		hawaiiensis	3B	0	0	21.5	3.2	1227
USNM	240540	Laos	Mainland	Mainland	Mainland	m	concolor		3 or more	5 or more	18	5.376	2818
USNM	240542	Laos	Mainland	Mainland	Mainland	f	concolor		3 or more	5 or more	18	5.376	2818
USNM	240916	Oahu	Polynesia	Remote Oceania	Hawaii	m	hawaiiensis	3B	0	0	21.5	3.2	1227
USNM	240917	Oahu	Polynesia	Remote Oceania	Hawaii	f	hawaiiensis	3B	0	0	21.5	3.2	1227
USNM	243864	Wake Island	Micronesia	Micronesia	US Minor Outying Islands	m	exulans		0	0	19.3	0.851	6
USNM	243869	Wake Island	Micronesia	Micronesia	US Minor Outying Islands	m	exulans		0	0	19.3	0.851	6
USNM	243870	Wake Island	Micronesia	Micronesia	US Minor Outying Islands	m	exulans		0	0	19.3	0.851	6
USNM	243884	Wake Island	Micronesia	Micronesia	US Minor Outying Islands	f	exulans		0	0	19.3	0.851	6
USNM	243889	Wake Island	Micronesia	Micronesia	US Minor Outying Islands	m	exulans		0	0	19.3	0.851	6
USNM	243891	Kure Atoll	Polynesia	Remote Oceania	Hawaii	m	hawaiiensis	3B	0	0	28.41	-0.11	6
USNM	243893	Kure Atoll	Polynesia	Remote Oceania	Hawaii	m	hawaiiensis	3B	0	0	28.41	-0.11	6
USNM	243894	Kure Atoll	Polynesia	Remote Oceania	Hawaii	m	hawaiiensis	3B	0	0	28.41	-0.11	6
USNM	243896	Kure Atoll	Polynesia	Remote Oceania	Hawaii	m	hawaiiensis	3B	0	0	28.41	-0.11	6
USNM	243898	Kure Atoll	Polynesia	Remote Oceania	Hawaii	m	hawaiiensis	3B	0	0	28.41	-0.11	6
USNM	257023	Maui	Polynesia	Remote Oceania	Hawaii	f	hawaiiensis	3B	0	0	20.75	3.28	3052
USNM	257425	Hatutaa	Polynesia	Remote Oceania	Marquesas	f	exulans	3B	0	0	7.93	1.258	428
USNM	257426	Hatutaa	Polynesia	Remote Oceania	Marquesas	m	exulans	3B	0	0	7.93	1.258	428
USNM	257427	Eiao	Polynesia	Remote Oceania	Marquesas	f	exulans	3B	0	0	8.3	1.642	576
USNM	257925	Maui	Polynesia	Remote Oceania	Hawaii	m	hawaiiensis	3B	0	0	20.75	3.28	3052
USNM	257926	Maui	Polynesia	Remote Oceania	Hawaii	f	hawaiiensis	3B	0	0	20.75	3.28	3052
USNM	257928	Maui	Polynesia	Remote Oceania	Hawaii	f	hawaiiensis	3B	0	0	20.75	3.28	3052
USNM	257931	Maui	Polynesia	Remote Oceania	Hawaii	f	hawaiiensis	3B	0	0	20.75	3.28	3052
USNM	257932	Maui	Polynesia	Remote Oceania	Hawaii	m	hawaiiensis	3B	0	0	20.75	3.28	3052
USNM	257935	Maui	Polynesia	Remote Oceania	Hawaii	m	hawaiiensis	3B	0	0	20.75	3.28	3052
USNM	257937	Hawaii	Polynesia	Remote Oceania	Hawaii	m	hawaiiensis	3B	0	0	20.5	4.018	4169
USNM	257938	Hawaii	Polynesia	Remote Oceania	Hawaii	m	hawaiiensis	3B	0	0	20.5	4.018	4169
USNM	257939	Hawaii	Polynesia	Remote Oceania	Hawaii	f	hawaiiensis	3B	0	0	20.5	4.018	4169
USNM	257940	Hawaii	Polynesia	Remote Oceania	Hawaii	f	hawaiiensis	3B	0	0	20.5	4.018	4169
USNM	257941	Hawaii	Polynesia	Remote Oceania	Hawaii	m	hawaiiensis	3B	0	0	20.5	4.018	4169
USNM	257942	Hawaii	Polynesia	Remote Oceania	Hawaii	f	hawaiiensis	3B	0	0	20.5	4.018	4169
USNM	260693		Melanesia	Remote Oceania	Fiji	m	exulans	3B	0	0	17.8
USNM	260694		Melanesia	Remote Oceania	Fiji	f	exulans	3B	0	0	17.8
USNM	260695		Melanesia	Remote Oceania	Fiji	f	exulans	3B	0	0	17.8
USNM	261168	Luzon	Wallacea	PhBS	Philippines	m	negrinus		0	5 or more	16	5.041	2934
USNM	261220	Wake Island	Micronesia	Micronesia	US Minor Outying Islands	f	exulans		0	0	19.3	0.851	6
USNM	271506	Grande Terre	Melanesia	Inter Oceania	New Caledonia	f	vitiensis	3A 3B	0	0	21.4	4.221	1618
USNM	271508	Grande Terre	Melanesia	Inter Oceania	New Caledonia	m	vitiensis	3A 3B	0	0	21.4	4.221	1618
USNM	271510	Grande Terre	Melanesia	Inter Oceania	New Caledonia	f	vitiensis	3A 3B	0	0	21.4	4.221	1618
USNM	271512	Grande Terre	Melanesia	Inter Oceania	New Caledonia	f	vitiensis	3A 3B	0	0	21.4	4.221	1618
USNM	271515	Efaté	Polynesian Outlier	Inter Oceania	Vanuatu	m	vitiensis	3	0	0	17.69	2.954	647
USNM	271516	Efaté	Polynesian Outlier	Inter Oceania	Vanuatu	m	vitiensis	3	0	0	17.69	2.954	647
USNM	271519	Efaté	Polynesian Outlier	Inter Oceania	Vanuatu	f	vitiensis	3	0	0	17.69	2.954	647
USNM	271522	Efaté	Polynesian Outlier	Inter Oceania	Vanuatu	f	vitiensis	3	0	0	17.69	2.954	647
USNM	271523	Efaté	Polynesian Outlier	Inter Oceania	Vanuatu	f	vitiensis	3	0	0	17.69	2.954	647
USNM	271524	Efaté	Polynesian Outlier	Inter Oceania	Vanuatu	m	vitiensis	3	0	0	17.69	2.954	647
USNM	276635	Kwajalein	Micronesia	Micronesia	Marshall Islands	f	exulans		0	0	9.25	1.204	5
USNM	276739	Guadalcanal	Melanesia	Island PNG	Solomons	f	vitiensis	2	0	1 to 4	9.6	3.729	2447
USNM	276745	Grande Terre	Melanesia	Inter Oceania	New Caledonia	m	vitiensis	3A 3B	0	0	21.4	4.221	1618
USNM	276754	Grande Terre	Melanesia	Inter Oceania	New Caledonia	m	vitiensis	3A 3B	0	0	21.4	4.221	1618
USNM	276908	Emirau	Melanesia	Island PNG	Bismarck	m	vitiensis	2	0	0	1.64	1.613	37
USNM	276909	Emirau	Melanesia	Island PNG	Bismarck	m	vitiensis	2	0	0	1.64	1.613	37
USNM	276918	Espiritu Santo	Micronesia	Inter Oceania	Vanuatu	m	vitiensis	3	0	0	15.39	3.597	1879
USNM	276919	Espiritu Santo	Micronesia	Inter Oceania	Vanuatu	f	vitiensis	3	0	0	15.39	3.597	1879
USNM	276920	Espiritu Santo	Micronesia	Inter Oceania	Vanuatu	f	vitiensis	3	0	0	15.39	3.597	1879
USNM	276922	Espiritu Santo	Micronesia	Inter Oceania	Vanuatu	f	vitiensis	3	0	0	15.39	3.597	1879
USNM	277073	Emirau	Melanesia	Island PNG	Bismarck	m	vitiensis	2	0	0	1.64	1.613	37
USNM	277467	Guam	Micronesia	Micronesia	Marianas	m	exulans	3B	0	0	13.42	2.733	393
USNM	277468	Guam	Micronesia	Micronesia	Marianas	m	exulans	3B	0	0	13.42	2.733	393
USNM	277473	Guam	Micronesia	Micronesia	Marianas	m	exulans	3B	0	0	13.42	2.733	393
USNM	277583	Mindoro	Wallacea	PhBS	Philippines	m	negrinus		1 or 2	5 or more	12.9	4.024	2585
USNM	277584	Mindoro	Wallacea	PhBS	Philippines	m	negrinus		1 or 2	5 or more	12.9	4.024	2585
USNM	277585	Mindoro	Wallacea	PhBS	Philippines	f	negrinus		1 or 2	5 or more	12.9	4.024	2585
USNM	277640	Mindoro	Wallacea	PhBS	Philippines	f	negrinus		1 or 2	5 or more	12.9	4.024	2585
USNM	277641	Mindoro	Wallacea	PhBS	Philippines	m	negrinus		1 or 2	5 or more	12.9	4.024	2585
USNM	277643	Mindoro	Wallacea	PhBS	Philippines	f	negrinus		1 or 2	5 or more	12.9	4.024	2585
USNM	277698	Luzon	Wallacea	PhBS	Philippines	m	negrinus		0	5 or more	16	5.041	2934
USNM	277699	Luzon	Wallacea	PhBS	Philippines	f	negrinus		0	5 or more	16	5.041	2934
USNM	277700	Luzon	Wallacea	PhBS	Philippines	m	negrinus		0	5 or more	16	5.041	2934
USNM	277708	Saipan	Micronesia	Micronesia	Marianas	f	exulans	3B	0	0	11.9	4.109	850
USNM	277947	Espiritu Santo	Micronesia	Inter Oceania	Vanuatu	m	vitiensis	3	0	0	15.39	3.597	1879
USNM	277949	Espiritu Santo	Micronesia	Inter Oceania	Vanuatu	m	vitiensis	3	0	0	15.39	3.597	1879
USNM	278076	Guadalcanal	Melanesia	Island PNG	Solomons	m	vitiensis	2	0	1 to 4	9.6	3.729	2447
USNM	278079	Guadalcanal	Melanesia	Island PNG	Solomons	m	vitiensis	2	0	1 to 4	9.6	3.729	2447
USNM	278084	Guadalcanal	Melanesia	Island PNG	Solomons	f	vitiensis	2	0	1 to 4	9.6	3.729	2447
USNM	278092	Guadalcanal	Melanesia	Island PNG	Solomons	m	vitiensis	2	0	1 to 4	9.6	3.729	2447
USNM	278093	Guadalcanal	Melanesia	Island PNG	Solomons	f	vitiensis	2	0	1 to 4	9.6	3.729	2447
USNM	278134	Samar	Wallacea	PhBS	Philippines	m	negrinus		0	1 to 4	11.9	4.109	850
USNM	278135	Samar	Wallacea	PhBS	Philippines	m	negrinus		0	1 to 4	11.9	4.109	850
USNM	278136	Samar	Wallacea	PhBS	Philippines	f	negrinus		0	1 to 4	11.9	4.109	850
USNM	278137	Samar	Wallacea	PhBS	Philippines	f	negrinus		0	1 to 4	11.9	4.109	850
USNM	278365	Guam	Micronesia	Micronesia	Marianas	f	exulans	3B	0	0	13.42	2.733	393
USNM	278375	Guam	Micronesia	Micronesia	Marianas	f	exulans	3B	0	0	13.42	2.733	393
USNM	278632	Luzon	Wallacea	PhBS	Philippines	m	negrinus		0	5 or more	16	5.041	2934
USNM	278636	Luzon	Wallacea	PhBS	Philippines	f	negrinus		0	5 or more	16	5.041	2934
USNM	278802	Ulithi Atoll	Micronesia	Micronesia	Carolines	f	exulans	3	0	0	9.97	0.653	10
USNM	278807	Ulithi Atoll	Micronesia	Micronesia	Carolines	f	exulans	3	0	0	9.97	0.653	10
USNM	278810	Ulithi Atoll	Micronesia	Micronesia	Carolines	f	exulans	3	0	0	9.97	0.653	10
USNM	278811	Ulithi Atoll	Micronesia	Micronesia	Carolines	m	exulans	3	0	0	9.97	0.653	10
USNM	278812	Ulithi Atoll	Micronesia	Micronesia	Carolines	m	exulans	3	0	0	9.97	0.653	10
USNM	278813	Ulithi Atoll	Micronesia	Micronesia	Carolines	m	exulans	3	0	0	9.97	0.653	10
USNM	278938	Guam	Micronesia	Micronesia	Marianas	f	exulans	3B	0	0	13.42	2.733	393
USNM	279395	Koror	Micronesia	Micronesia	Carolines	m	micronesiensis		0	0	7.35	0.968	100
USNM	279472	Koror	Micronesia	Micronesia	Carolines	f	micronesiensis		0	0	7.35	0.968	100
USNM	279473	Koror	Micronesia	Micronesia	Carolines	m	micronesiensis		0	0	7.35	0.968	100
USNM	279476	Koror	Micronesia	Micronesia	Carolines	f	micronesiensis		0	0	7.35	0.968	100
USNM	279479	Koror	Micronesia	Micronesia	Carolines	f	micronesiensis		0	0	7.35	0.968	100
USNM	279480	Koror	Micronesia	Micronesia	Carolines	f	micronesiensis		0	0	7.35	0.968	100
USNM	282127	Bikini	Micronesia	Micronesia	Marshall Islands	f	exulans		0	0	11.58	0.778	4
USNM	282128	Bikini	Micronesia	Micronesia	Marshall Islands	m	exulans		0	0	11.58	0.778	4
USNM	282129	Bikini	Micronesia	Micronesia	Marshall Islands	m	exulans		0	0	11.58	0.778	4
USNM	282130	Bikini	Micronesia	Micronesia	Marshall Islands	m	exulans		0	0	11.58	0.778	4
USNM	282246	Rongelap	Micronesia	Micronesia	Marshall Islands	f	exulans		0	0	11.5	0.892	3
USNM	282247	Rongelap	Micronesia	Micronesia	Marshall Islands	m	exulans		0	0	11.5	0.892	3
USNM	282340	Bikini	Micronesia	Micronesia	Marshall Islands	f	exulans		0	0	11.58	0.778	4
USNM	282840	Rongerik	Micronesia	Micronesia	Marshall Islands	m	exulans		0	0	11.37	0.322	3
USNM	282844	Rongerik	Micronesia	Micronesia	Marshall Islands	m	exulans		0	0	11.37	0.322	3
USNM	282854	Rongerik	Micronesia	Micronesia	Marshall Islands	m	exulans		0	0	11.37	0.322	3
USNM	290237	Malaya	Mainland	Mainland	Mainland	f	concolor		3 or more	5 or more	4	5.121	2187
USNM	290293	Malaya	Mainland	Mainland	Mainland	f	concolor		3 or more	5 or more	4	5.121	2187
USNM	290294	Malaya	Mainland	Mainland	Mainland	m	concolor		3 or more	5 or more	4	5.121	2187
USNM	295925	Thailand	Mainland	Mainland	Mainland	f	concolor		3 or more	5 or more	15	5.71	2565
USNM	297111	Thailand	Mainland	Mainland	Mainland	f	concolor		3 or more	5 or more	15	5.71	2565
USNM	300638	Kapingamarangi	Polynesian Outlier	Inter Oceania	Carolines	f	exulans	3A	0	0	0.57	0.041	1
USNM	301998	Pohnpei	Micronesia	Micronesia	Carolines	f	exulans	3	0	0	6.84	2.524	791
USNM	301999	Pohnpei	Micronesia	Micronesia	Carolines	f	exulans	3	0	0	6.84	2.524	791
USNM	302003	Pohnpei	Micronesia	Micronesia	Carolines	f	exulans	3	0	0	6.84	2.524	791
USNM	302004	Pohnpei	Micronesia	Micronesia	Carolines	m	exulans	3	0	0	6.84	2.524	791
USNM	302005	Pohnpei	Micronesia	Micronesia	Carolines	f	exulans	3	0	0	6.84	2.524	791
USNM	302010	Pohnpei	Micronesia	Micronesia	Carolines	m	exulans	3	0	0	6.84	2.524	791
USNM	302965	Pohnpei	Micronesia	Micronesia	Carolines	m	exulans	3	0	0	6.84	2.524	791
USNM	306274	Majuro	Micronesia	Micronesia	Marshall Islands	m	exulans		0	0	7.08	0.954	3
USNM	306282	Pohnpei	Micronesia	Micronesia	Carolines	m	exulans	3	0	0	6.84	2.524	791
USNM	308258	Kayangel	Micronesia	Micronesia	Carolines	m	micronesiensis		0	0	8.14	0.23	2
USNM	308268	Majuro	Micronesia	Micronesia	Marshall Islands	m	exulans		0	0	7.08	0.954	3
USNM	308283	Kayangel	Micronesia	Micronesia	Carolines	f	micronesiensis		0	0	8.14	0.23	2
USNM	308285	Kayangel	Micronesia	Micronesia	Carolines	f	micronesiensis		0	0	8.14	0.23	2
USNM	321204	Vietnam	Mainland	Mainland	Mainland	m	concolor		3 or more	5 or more	16	5.52	3143
USNM	321207	Vietnam	Mainland	Mainland	Mainland	f	concolor		3 or more	5 or more	16	5.52	3143
USNM	321210	Vietnam	Mainland	Mainland	Mainland	f	concolor		3 or more	5 or more	16	5.52	3143
USNM	321211	Vietnam	Mainland	Mainland	Mainland	f	concolor		3 or more	5 or more	16	5.52	3143
USNM	332462	Vietnam	Mainland	Mainland	Mainland	f	concolor		3 or more	5 or more	16	5.52	3143
USNM	334783	Vietnam	Mainland	Mainland	Mainland	m	concolor		3 or more	5 or more	16	5.52	3143
USNM	338661	Birnie	Micronesia	Remote Oceania	Kiribati	f	exulans		0	0	3.67	-0.699	4
USNM	338662	Birnie	Micronesia	Remote Oceania	Kiribati	f	exulans		0	0	3.67	-0.699	4
USNM	338664	Birnie	Micronesia	Remote Oceania	Kiribati	f	exulans		0	0	3.67	-0.699	4
USNM	338665	Birnie	Micronesia	Remote Oceania	Kiribati	m	exulans		0	0	3.67	-0.699	4
USNM	338672	Birnie	Micronesia	Remote Oceania	Kiribati	m	exulans		0	0	3.67	-0.699	4
USNM	338675	Birnie	Micronesia	Remote Oceania	Kiribati	m	exulans		0	0	3.67	-0.699	4
USNM	338683	Kiritimati	Polynesia	Remote Oceania	Line Islands		exulans		0	0	2	2.507	13
USNM	348866	Luzon	Wallacea	PhBS	Philippines	f	negrinus		0	5 or more	16	5.041	2934
USNM	348876	Palawan	Sunda	PhBS	Sunda	m	negrinus		3 or more	5 or more	10	4.086	2085
USNM	348947	Luzon	Wallacea	PhBS	Philippines	f	negrinus		0	5 or more	16	5.041	2934
USNM	348954	Palawan	Sunda	PhBS	Sunda	m	negrinus		3 or more	5 or more	10	4.086	2085
USNM	348956	Palawan	Sunda	PhBS	Sunda	f	negrinus		3 or more	5 or more	10	4.086	2085
USNM	348958	Palawan	Sunda	PhBS	Sunda	m	negrinus		3 or more	5 or more	10	4.086	2085
USNM	356803	Vietnam	Mainland	Mainland	Mainland	f	concolor		3 or more	5 or more	16	5.52	3143
USNM	356913	Vietnam	Mainland	Mainland	Mainland	f	concolor		3 or more	5 or more	16	5.52	3143
USNM	356914	Vietnam	Mainland	Mainland	Mainland	f	concolor		3 or more	5 or more	16	5.52	3143
USNM	356917	Vietnam	Mainland	Mainland	Mainland	f	concolor		3 or more	5 or more	16	5.52	3143
USNM	356920	Vietnam	Mainland	Mainland	Mainland	f	concolor		3 or more	5 or more	16	5.52	3143
USNM	356989	Vietnam	Mainland	Mainland	Mainland	m	concolor		3 or more	5 or more	16	5.52	3143
USNM	357025	Con Son	Sunda	Southern Malay Archipelago	Sunda	f	concolor		1 or 2	1 to 4	8.69	1.712	577
USNM	357355	Con Son	Sunda	Southern Malay Archipelago	Sunda	m	concolor		1 or 2	1 to 4	8.69	1.712	577
USNM	357359	Con Son	Sunda	Southern Malay Archipelago	Sunda	m	concolor		1 or 2	1 to 4	8.69	1.712	577
USNM	357361	Con Son	Sunda	Southern Malay Archipelago	Sunda	m	concolor		1 or 2	1 to 4	8.69	1.712	577
USNM	357373	Con Son	Sunda	Southern Malay Archipelago	Sunda	f	concolor		1 or 2	1 to 4	8.69	1.712	577
USNM	357379	Con Son	Sunda	Southern Malay Archipelago	Sunda	f	concolor		1 or 2	1 to 4	8.69	1.712	577
USNM	357381	Con Son	Sunda	Southern Malay Archipelago	Sunda	f	concolor		1 or 2	1 to 4	8.69	1.712	577
USNM	357781	Vietnam	Mainland	Mainland	Mainland	m	concolor		3 or more	5 or more	16	5.52	3143
USNM	357787	Vietnam	Mainland	Mainland	Mainland	m	concolor		3 or more	5 or more	16	5.52	3143
USNM	358877	Vietnam	Mainland	Mainland	Mainland	f	concolor		3 or more	5 or more	16	5.52	3143
USNM	360995	Nukunono	Polynesia	Remote Oceania	Tokelau	m	exulans	3A 3B	0	0	9.17	0.732	4
USNM	360997	Atafu	Polynesia	Remote Oceania	Tokelau	f	exulans	3A 3B	0	0	8.67	0.342	4
USNM	360998	Atafu	Polynesia	Remote Oceania	Tokelau	f	exulans	3A 3B	0	0	8.67	0.342	4
USNM	361382	Kure Atoll	Polynesia	Remote Oceania	Hawaii	m	hawaiiensis	3B	0	0	28.41	-0.11	6
USNM	361383	Kure Atoll	Polynesia	Remote Oceania	Hawaii	f	hawaiiensis	3B	0	0	28.41	-0.11	6
USNM	361441	Vostok	Polynesia	Remote Oceania	Line Islands	f	exulans		0	0	10.8	-0.699	5
USNM	361443	Vostok	Polynesia	Remote Oceania	Line Islands	f	exulans		0	0	10.8	-0.699	5
USNM	361444	Vostok	Polynesia	Remote Oceania	Line Islands	f	exulans		0	0	10.8	-0.699	5
USNM	361446	Vostok	Polynesia	Remote Oceania	Line Islands	m	exulans		0	0	10.8	-0.699	5
USNM	361447	Vostok	Polynesia	Remote Oceania	Line Islands	m	exulans		0	0	10.8	-0.699	5
USNM	361448	Vostok	Polynesia	Remote Oceania	Line Islands	m	exulans		0	0	10.8	-0.699	5
USNM	362196	Swains	Polynesia	Remote Oceania	Samoa	m	exulans	3	0	0	11.06	0.556	6
USNM	362197	Swains	Polynesia	Remote Oceania	Samoa	f	exulans	3	0	0	11.06	0.556	6
USNM	362198	Swains	Polynesia	Remote Oceania	Samoa	f	exulans	3	0	0	11.06	0.556	6
USNM	362201	Swains	Polynesia	Remote Oceania	Samoa	f	exulans	3	0	0	11.06	0.556	6
USNM	362202	Swains	Polynesia	Remote Oceania	Samoa	f	exulans	3	0	0	11.06	0.556	6
USNM	458834	Negros	Wallacea	PhBS	Philippines	f	negrinus	1 2	0	1 to 4	10	4.116	2464
USNM	462209	Dinagat	Wallacea	PhBS	Philippines	m	negrinus		0	5 or more	10.15	2.699	923
USNM	462218	Dinagat	Wallacea	PhBS	Philippines	m	negrinus		0	5 or more	10.15	2.699	923
USNM	462221	Dinagat	Wallacea	PhBS	Philippines	f	negrinus		0	5 or more	10.15	2.699	923
USNM	462223	Dinagat	Wallacea	PhBS	Philippines	f	negrinus		0	5 or more	10.15	2.699	923
USNM	478031	Balabac	Sunda	PhBS	Sunda	f	negrinus		1 or 2	1 to 4	7.95	2.504	568
USNM	478032	Balabac	Sunda	PhBS	Sunda	f	negrinus		1 or 2	1 to 4	7.95	2.504	568
USNM	478034	Balabac	Sunda	PhBS	Sunda	m	negrinus		1 or 2	1 to 4	7.95	2.504	568
USNM	478035	Balabac	Sunda	PhBS	Sunda	m	negrinus		1 or 2	1 to 4	7.95	2.504	568
USNM	478037	Balabac	Sunda	PhBS	Sunda	m	negrinus		1 or 2	1 to 4	7.95	2.504	568
USNM	478082	Palawan	Sunda	PhBS	Sunda	f	negrinus		3 or more	5 or more	10	4.086	2085
USNM	478088	Palawan	Sunda	PhBS	Sunda	m	negrinus		3 or more	5 or more	10	4.086	2085
USNM	478089	Busuanga	Wallacea	PhBS	Philippines	m	negrinus		1 or 2	1 to 4	12.08	2.991	653
USNM	478090	Busuanga	Wallacea	PhBS	Philippines	f	negrinus		1 or 2	1 to 4	12.08	2.991	653
USNM	478092	Busuanga	Wallacea	PhBS	Philippines	m	negrinus		1 or 2	1 to 4	12.08	2.991	653
USNM	478094	Busuanga	Wallacea	PhBS	Philippines	f	negrinus		1 or 2	1 to 4	12.08	2.991	653
USNM	478097	Busuanga	Wallacea	PhBS	Philippines	m	negrinus		1 or 2	1 to 4	12.08	2.991	653
USNM	478104	Busuanga	Wallacea	PhBS	Philippines	m	negrinus		1 or 2	1 to 4	12.08	2.991	653
USNM	478106	Culion	Wallacea	PhBS	Philippines	m	negrinus		1 or 2	1 to 4	11.08	2.699	460
USNM	478107	Culion	Wallacea	PhBS	Philippines	f	negrinus		1 or 2	1 to 4	11.08	2.699	460
USNM	478109	Culion	Wallacea	PhBS	Philippines	m	negrinus		1 or 2	1 to 4	11.08	2.699	460
USNM	478110	Culion	Wallacea	PhBS	Philippines	f	negrinus		1 or 2	1 to 4	11.08	2.699	460
USNM	481563	Java	Sunda	Southern Malay Archipelago	Sunda	f	ephippium		3 or more	5 or more	7.5	5.142	3676
USNM	481567	Java	Sunda	Southern Malay Archipelago	Sunda	f	ephippium		3 or more	5 or more	7.5	5.142	3676
USNM	521887	Ambon	Wallacea	Malukus	Malukus	m			0	0	3.64	2.906	1031
USNM	521889	Ambon	Wallacea	Malukus	Malukus	f			0	0	3.64	2.906	1031
USNM	521890	Ambon	Wallacea	Malukus	Malukus	f			0	0	3.64	2.906	1031
USNM	530806	Guguan	Micronesia	Micronesia	Marianas	m	exulans		0	0	17.33	0.602	301
USNM	532890	Aunuu	Polynesia	Remote Oceania	Samoa	f	exulans	3	0	0	14.29	0.204	61
USNM	532895	Rose Atoll	Polynesia	Remote Oceania	Samoa	m	exulans	3	0	0	14.53	-1	3
USNM	532896	Rose Atoll	Polynesia	Remote Oceania	Samoa	m	exulans	3	0	0	14.53	-1	3
USNM	532898	Rose Atoll	Polynesia	Remote Oceania	Samoa	f	exulans	3	0	0	14.53	-1	3
USNM	532900	Rose Atoll	Polynesia	Remote Oceania	Samoa	f	exulans	3	0	0	14.53	-1	3
USNM	532907	Ofu	Polynesia	Remote Oceania	Samoa	f	exulans	3A 3B	0	0	14.19	0.875	494
USNM	532909	Ofu	Polynesia	Remote Oceania	Samoa	m	exulans	3A 3B	0	0	14.19	0.875	494
USNM	532910	Olosega	Polynesia	Remote Oceania	Samoa	m	exulans	3A 3B	0	0	14.19	0.732	639
USNM	533419	Thailand	Mainland	Mainland	Mainland	f	concolor		3 or more	5 or more	15	5.71	2565
USNM	533423	Thailand	Mainland	Mainland	Mainland	m	concolor		3 or more	5 or more	15	5.71	2565
USNM	538392	Enewetak	Micronesia	Micronesia	Marshall Islands	f	exulans		0	0	11.5	0.763	4
USNM	575115	Batan	Wallacea	PhBS	Philippines		negrinus		0	0	20.42	1.979	1009
USNM	580040	New Ireland	Melanesia	Island PNG	Bismarck	m	vitiensis	2	0	1 to 4	3.7	3.869	2150
USNM	580042	New Ireland	Melanesia	Island PNG	Bismarck	m	vitiensis	2	0	1 to 4	3.7	3.869	2150
USNM	580043	New Ireland	Melanesia	Island PNG	Bismarck	f	vitiensis	2	0	1 to 4	3.7	3.869	2150
